# Supplementary material for: Antibiotic-Loaded Psyllium Husk Hemicellulose and Gelatin-Based Polymeric Films for Wound Dressing Application
Source: PubMed Central journal article supplement (PMC7914473; doi:10.3390/pharmaceutics13020236), 2021-02-07
Supplement: pharmaceutics-13-00236-s001.pdf [file pharmaceutics-13-00236-s001.pdf]

# Supplementary Materials: Antibiotic-Loaded Psyllium Husk Hemicellulose and Gela-tin-Based Polymeric Films for Wound Dressing Application

Naveed Ahmad\*, Muhammad Masood Ahmad, Nabil K. Alruwaili, Ziyad Awadh Alrowaili, Fadhel Ahmed Alomar, Sultan Akhtar, Omar Awad Alsaidan, Nabil A. Alhakamy, Ameduzzafar zafar, Mohammed Elmowafy and Mohammed H. Elkomy

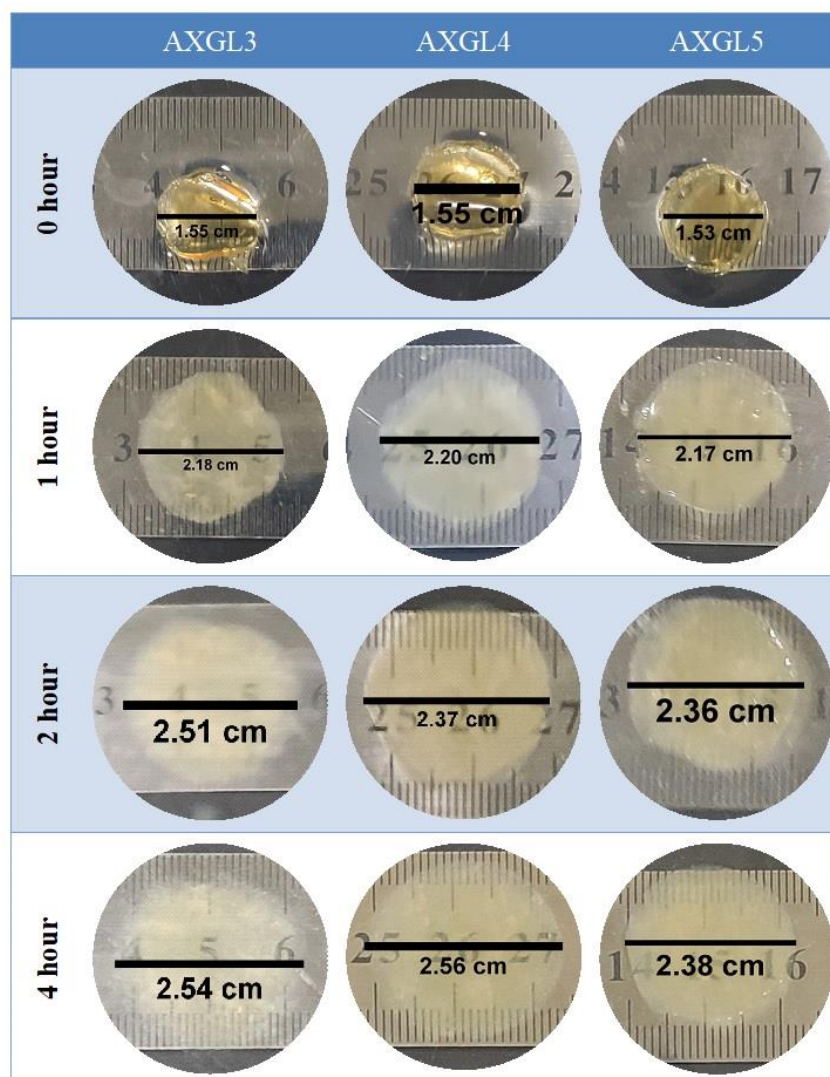

**Figure S1.** Photographs of the AX-GL films captured at different time intervals during expectation study.

**Publisher’s Note:** MDPI stays neutral with regard to jurisdictional claims in published maps and institutional affiliations.

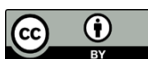

**Copyright:** © 2020 by the authors. Submitted for possible open access publication under the terms and conditions of the Creative Commons Attribution (CC BY) license (<http://creativecommons.org/licenses/by/4.0/>).

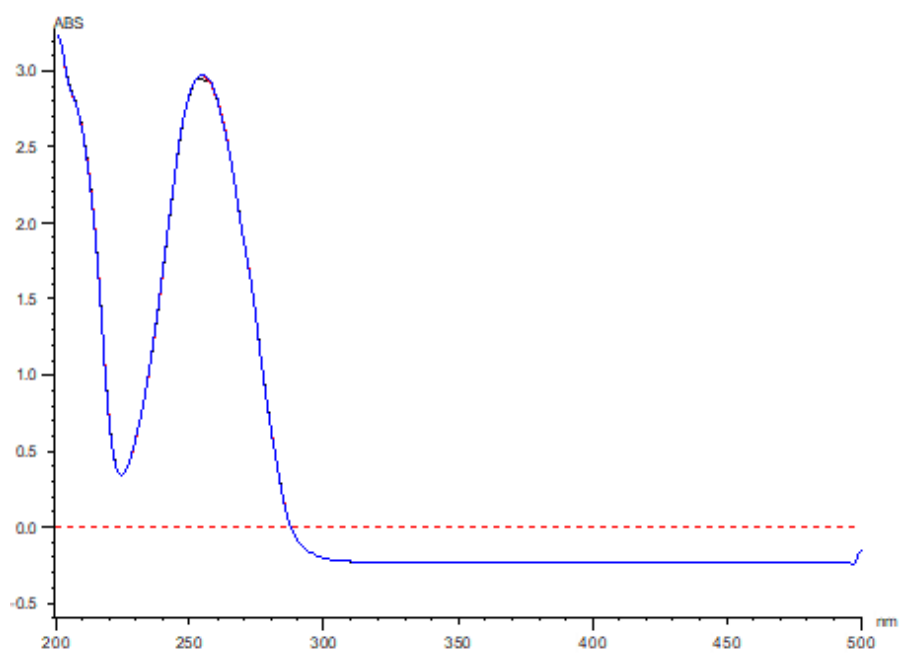

Figure S2. UV-visible spectrum of gentamicin sulfate (GM) solution.

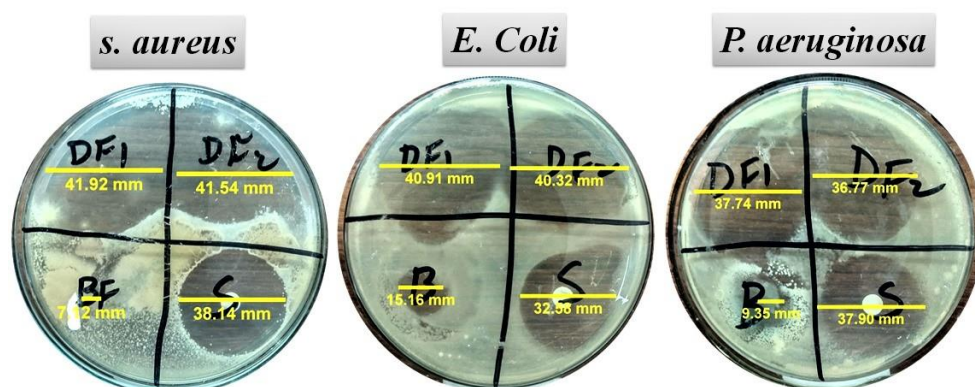

Figure S3. Antibacterial activity of AX-GL films against *S. aureus*, *E. coli*, and *P. aeruginosa*.

**Table S1.** Physical assessment of the AX-GL films and criteria for selection.

| Code  | Peelability | Transparency | Surface | Foldability | Remarks                                                                                                       |
|-------|-------------|--------------|---------|-------------|---------------------------------------------------------------------------------------------------------------|
| AXGL1 | ×           | √            | √       | -           | <b>Rejected:</b> Films ruptured during peeling from plate                                                     |
| AXGL2 | ×           | √            | ×       | -           | <b>Rejected:</b> Films showed rough surface and ruptured during peeling from plate                            |
| AXGL3 | √           | √            | √       | √           | <b>Selected:</b> Transparent, easily peelable, and foldable films                                             |
| AXGL4 | √           | √            | √       | √           | <b>Selected:</b> Transparent, easily peelable, and foldable films                                             |
| AXGL5 | √           | √            | √       | √           | <b>Selected:</b> Transparent, easily peelable, and foldable films                                             |
| AXGL6 | -           | -            | -       | -           | <b>Rejected:</b> The film casting gel was highly viscous that was difficult to stir and pour for casting film |

**Table S2.** Major peaks observed in the FTIR spectra and assigned functional groups.

| Samples    | νOH  | νCH <sub>2</sub> ,<br>νCH | -COOH         | Pyran<br>ring | Glycosidi<br>c bond | N-H  | Amide I | Amide II | C-O  |
|------------|------|---------------------------|---------------|---------------|---------------------|------|---------|----------|------|
| AX         | 3340 | 2950,<br>2899             | 1625,<br>1440 | 1044          | 930                 | -    | -       | -        | -    |
| Glycerol   | 3319 | 2952,<br>2906             |               | -             |                     | -    | -       | -        | 1045 |
| GM         | 3299 | -                         |               | 1048          | 912                 | -    | 1635    | 1544     | -    |
| GL         | 3315 | 2941                      | 1440          | -             | -                   | 3315 | 1640    | 1557     | 1090 |
| AXGL5      | 3312 | 2958,<br>2906             | 1437          | 1043          | 930                 | 3312 | 1650    | 1560     | 1043 |
| AXGL5<br>D | 3314 | 2952,<br>2898             | 1422          | 1039          | 928                 | 1314 | 1650    | 1560     | 1039 |

Values represents wavenumber (cm<sup>-1</sup>) at which peaks were observed.
